# Supplementary material for: PtrABF of Poncirus trifoliata functions in dehydration tolerance by reducing stomatal density and maintaining reactive oxygen species homeostasis
Source: PubMed Central journal article supplement (PMC4566982; doi:10.1093/jxb/erv301), 2015-06-25
Supplement: supp_erv301_jexbot143024_file001.pdf [file supp_erv301_jexbot143024_file001.pdf]

**PtrABF of Poncirus trifoliata functions in dehydration tolerance by reducing stomatal density and maintaining ROS homeostasis**

Qinghua Zhang, Min Wang, Wei Wang, Xingzheng Fu, and Ji-Hong Liu

*Supplemental Files*

**Table S1.** Primer sequences used for this study.

| Purpose                             | Primers             | Sequences (5'-3')          |                            |
|-------------------------------------|---------------------|----------------------------|----------------------------|
|                                     |                     | Forward                    | Reverse (5'-3')            |
| <i>Transgenic identification</i>    | NPTII               | AGACAATCGGCTGCTCTGAT       | TCATTTCGAACCCCAGAGTC       |
|                                     | PtrABF-1            | CCGGAACCTCCTCGGATTCCATTGCC | GGTGCCATGTAGTATGGACTGCCACA |
| <i>Gene expression</i>              | PtrABF              | GTGGACTGGGGAAGGATTT        | GTCCCTCCAAACTTCATCG        |
|                                     | PtrSPCH             | AAGACAGCAGCTACATCGGC       | GCATGAGTGAGCGCAAACA        |
|                                     | PtrMUTE             | CATCGCGTGTGAGGTTGTG        | CTCTTCTGGCAACGGTGGAT       |
|                                     | PtrFAMA             | AGCGATGTATCGGCTCATGG       | TCAGAATCACGGCCCAACTC       |
|                                     | PtADC               | AGTCATTGACATCGGGGCG        | GCTTGAACAACGGCAGAGGC       |
|                                     | PtPOD               | AAGTTGAATTGGGGAGGCGT       | ATCGTATGCGGCCTGATAA        |
|                                     | <i>NPTII</i>        | AGACAATCGGCTGCTCTGAT       | TCATTTCGAACCCCAGAGTC       |
| <i>Microarray data verification</i> | Cit.39178.1.S1_s_at | AAACTAAAGCCACGGCCCAA       | GAGCTCCGCTTGCAATTCTTC      |
|                                     | Cit.12301.1.S1_at   | CCCAAACCCATCTGGTCACA       | TGCATCTCCGAGACTTCACC       |
|                                     | Cit.19911.1.S1_s_at | ATGGACGAAGTACGCAAGGT       | GCCGTCAAGTGTGATCTCAT       |
|                                     | Cit.17318.1.S1_at   | TCGACCCTTCCAGTCCATGA       | GCGCGGGCATGATACATTTT       |
|                                     | Cit.21952.1.S1_at   | TCCGGAATATGCGATGAGTGG      | GCCTTCATTCCACAGTTGCC       |
|                                     | Cit.3096.1.S1_s_at  | ATCCTCACTGAAAGGCGGAG       | TAGCGTCGATGAGGATGGGA       |
|                                     | Cit.29605.1.S1_at   | GTCAAGGAGACACCGAGCAA       | AGCCTGTGGCCTTCCAATAC       |
|                                     | Cit.18183.1.S1_at   | GCTCCACGCAGACAAAATCG       | TCACCTTGCACCTTGGATGT       |
|                                     | Cit.29611.1.S1_at   | GGACAGCATTGGAAGGGACT       | GTTGCTAAACAACCTCGGGC       |
|                                     | Cit.28635.1.S1_at   | AGTGGATGAAGCAGGTGTGT       | AAGAAATCTGCTGGTGGCGT       |
| <i>Internal control</i>             | Actin               | ATTGTAACTGGGATGATA         | AGAGGCCTCAGAGAAG           |
| <i>Promoter amplification</i>       | pPOD                | CCACCATTCAATAATGGCATGTGATT | AGAGAGAAGCACCCAGCTATCTT    |
|                                     | pADC                | GGGTTGGTGGGCCTAAAGGC       | GTGTCGGGGGAGGGAGTTCAG      |

|                                   |                |                                                |                                                |
|-----------------------------------|----------------|------------------------------------------------|------------------------------------------------|
| <i>Yeast one-hybrid assay</i>     | pGADT7-PtrABF  | TCC <u>CCCGGG</u> ATGGGATCTCAAATGAACTACAAG     | CGC <u>GGATCC</u> AGTGTCTCCTCAAGCACAGTATT      |
|                                   | pAbAi-pPOD'    | TCC <u>CCCGGGG</u> CGGCATTTTTTATTTTT           | CCG <u>CTCGAG</u> CATGTCGTCAGATCTTTTA          |
| <i>Transient expression assay</i> | pAbAi-pADC'    | CCG <u>GAAATC</u> ATCATGCCACGACTGATGAGC        | CCG <u>CTCGAG</u> CTTCGCCTCAATGAAGGATTTGC      |
|                                   | pGreenII       | CCG <u>CTCGAGT</u> CCGCGGCATTTTTTATTTTT        | TCC <u>CCCGGGC</u> ATGTCGTCAGATCTTTTA          |
|                                   | 0800-LUC-pPOD' |                                                |                                                |
| <i>Subcellular localization</i>   | pGreenII       | CCG <u>CTCGAG</u> CCCTCATGGAACACATGAATG        | TCC <u>CCCGGG</u> CCTCAATGAAGGATTTGC           |
|                                   | 0800-LUC-pADC' |                                                |                                                |
|                                   | pGreenII 0029  | CGC <u>GGATCC</u> ATGGGATCTCAAATGAACTACAAG     | TCC <u>CCCGGG</u> CTCAAGCACAGTATTTTTGC         |
| <i>Subcellular localization</i>   | 62-SK-ABF      |                                                |                                                |
|                                   | PtrABF-sub     | GTGAATTCATCGATGGATCC ATGGGATCT<br>CAAATGAACTA  | TTTACTCATCTCGAGCCCGGG CCAAGGG<br>CCTGTCAGTGTCC |
| <i>Y2H</i>                        | PtrICE-sub 1   | AGTGAATTCATCGATGGATCC ATGCTTTCT<br>AGACTAAACGG | TTTACTCATCTCGAGCCCGGGCCAAGGG<br>CCTGTCAGTGTCC  |
|                                   | ICE13C         | CGG <u>GGTACC</u> CTTGGTGACCCAACAACACTGA       | CCG <u>CTCGAG</u> ATGCCATGGAAGCCGGCTGAAT       |
| <i>BiFC</i>                       | ABF3C          | CGG <u>GGTACC</u> ATTGGAGCAAGCTGTTGCCA         | CCG <u>CTCGAG</u> TACTCTACCAAGGGCCTGTCAGT      |
|                                   | ICE1-BiFC      | CG <u>GATCC</u> ATGCTTTCTAGACTAAACGGTGTG       | CC <u>ATCGAT</u> CATCATGCCATGGAAGCCG           |
|                                   | ABF- BiFC      | CG <u>GGATCC</u> ATGGGATCTCAAATGAACTACAAG      | CC <u>ATCGAT</u> CCAAGGGCCTGTCAGTGT            |
|                                   | bZIP63- BiFC   | CGG <u>GATCC</u> ATGGAAAAAGTTTTCTCCGACG        | CCG <u>CTCGAG</u> CTGATCCCCAACGCTTCGAAT        |

---

**Table S2.** Comparison of stomatal development genes between *Poncirus trifoliata* and *Arabidopsis thaliana*.

| Gene           | Sequence number   | Homology with <i>Arabidopsis thaliana</i> counterpart |                                      |                  |      |
|----------------|-------------------|-------------------------------------------------------|--------------------------------------|------------------|------|
|                |                   | E-value                                               | Genes of <i>Arabidopsis thaliana</i> | Accession number | Size |
| <i>PtrSPCH</i> | orange1.1g042904m | 6.E-63                                                | <i>AtSPCH</i>                        | DQ868373.1       | 1095 |
| <i>PtrMUTE</i> | orange1.1g013752m | 2.E-11                                                | <i>AtMUTE</i>                        | NM_111487.2      | 823  |
| <i>PtrFAMA</i> | orange1.1g014477m | 3E-70                                                 | <i>AtFAMA</i>                        | NM_113319.4      | 1729 |

**Table S3.** A list of genes down-regulated in transgenic line #10 overexpressing *P<sub>tr</sub>ABF* in comparison with the wild type, as revealed by microarray analysis. The genes with a fold change  $\geq 2.0$  ( $P \leq 0.05$ ) are included.

| <b>Probe Set ID</b> | <b>Product description</b>                                                       | <b>Fold change</b> |
|---------------------|----------------------------------------------------------------------------------|--------------------|
| Cit.18116.1.S1_at   | Hypothetical proteins                                                            | -3.23598           |
| Cit.18318.1.S1_at   | Tetratricopeptide repeat (TPR)-like superfamily protein                          | -3.06828           |
| Cit.20851.1.S1_s_at | GA20OX1; 2-oxoglutarate (2OG) and Fe(II)-dependent oxygenase superfamily protein | -3.03745           |
| Cit.21081.1.S1_s_at | CRR3; chlororespiratory reduction 3                                              | -2.92676           |
| Cit.36781.1.S1_s_at | SLY1; F-box family protein                                                       | -2.90992           |
| Cit.2122.1.S1_at    | PIP1; plasma membrane intrinsic protein 1B                                       | -2.67013           |
| Cit.37161.1.S1_at   | MLP-like protein 28                                                              | -2.49362           |
| Cit.5796.1.S1_at    | MLP165; MLP-like protein 165                                                     | -2.45404           |
| Cit.16104.1.S1_at   | SULTR4; sulfate transporter 4.1                                                  | -2.3991            |
| Cit.18106.1.S1_at   | SEN1; Rhodanese/Cell cycle control phosphatase superfamily protein               | -2.32084           |
| Cit.5796.1.S1_s_at  | Choline monooxygenase, putative (CMO-like)                                       | -2.30716           |
| Cit.30315.1.S1_at   | SULTR4; sulfate transporter 4.1                                                  | -2.29048           |
| Cit.27993.1.S1_at   | Rhomboid-related intramembrane serine protease family protein                    | -2.28357           |
| Cit.2910.1.S1_at    | Rhomboid-related intramembrane serine protease family protein                    | -2.28295           |
| Cit.8476.1.S1_s_at  | Tetratricopeptide repeat (TPR)-like superfamily protein                          | -2.24811           |
| Cit.14227.1.S1_at   | Protein of unknown function (DUF581)                                             | -2.24418           |
| Cit.6961.1.S1_at    | Reticuline oxidase-like protein                                                  | -2.22411           |
| Cit.2990.1.S1_x_at  | LSU2;response to low sulfur 2                                                    | -2.22248           |

|                     |                                                   |          |
|---------------------|---------------------------------------------------|----------|
| Cit.2078.1.S1_at    | Glycine-rich RNA-binding protein 7                | -2.21509 |
| Cit.25338.1.S1_s_at | Glycine-rich RNA-binding protein 7                | -2.19157 |
| Cit.12774.1.S1_s_at | CYP76G1; cytochrome P450                          | -2.15022 |
| Cit.5183.1.S1_s_at  | Leucine-rich repeat protein kinase family protein | -2.13264 |
| Cit.10457.1.S1_s_at | CYP82G1; cytochrome P450                          | -2.09445 |
| Cit.10281.1.S1_s_at | CIPK6; SOS3-interacting protein 3                 | -2.0916  |
| Cit.10873.1.S1_s_at | HMT3; homocysteine S-methyltransferase 3          | -2.07316 |
| Cit.22431.1.S1_s_at | Protein of unknown function (DUF3464)             | -2.04993 |
| Cit.29468.1.S1_s_at | KRP2; KIP-related protein 2                       | -2.03932 |
| Cit.14652.1.S1_s_at | Hypothetical proteins                             | -2.02075 |

---

## Supporting information

**Fig. S1.** Generation and molecular identification of trifoliolate orange transgenic plants overexpressing *PtrABF*. (a) Co-culture of the shoot segments. (b) Regeneration of kanamycin-resistant shoots (shown by closed arrow head) from the cutting ends of shoot stem after culture on the selection medium for 60 d, while the kanamycin-sensitive shoot is shown by open arrow head. (c) A representative rooted plants. (d) Genomic PCR confirmation of the kanamycin-resistant plants using NPTII-specific primers (upper panel) or CaMV 35S-PtrABF primers (lower panel). M, molecular marker; +, plasmid DNA (used as a positive control); -, wild type (WT); the numbers indicate different transgenic lines (lines 8 and 10 are designated as #8 and #10, respectively). (e) qPCR analysis of transcript levels of *PtrABF* in WT, two transgenic lines (#8 and #10).

**Fig. S2.** Comparison of dehydration tolerance between wild type and transgenic plants containing NPTII gene. (a) Molecular characterization of transgenic plants by genomic PCR and RT-PCR. (a) Identification of *NPTII* gene in the transgenic plants via genomic PCR using primers specific to NPTII gene. M, molecular marker; P, plasmid DNA (used as a positive control); N, wild type (WT); NPT-1 and NPT-2 indicate two transgenic lines. (b) RT-PCR analysis of transcript levels of *NPTII* in WT and two transgenic lines (NPT-1 and NPT-2). Actin was used as an internal control. (c) Phenotypes of leaves wild type (WT) and transgenic lines (NPT-1 and NPT-2) and before and after 90 min of dehydration treatment at ambient environment. (d) Measurement of fresh water loss from the detached leaves of WT and transgenic lines at the end of dehydration. (e). Detection of cell death in wild type (WT) and transgenic lines (NPT-1 and NPT-2) after the dehydration.

**Fig. S3.** Subcellular localization of PtrABF and PtrICE1. Tobacco leaves were transiently transformed with constructs containing either control (35S::YFP, A) or fusion plasmids PtrABF::YFP (B) and PtrICE1::YFP. Images under blight field (left) and fluorescence (middle) were shown. The merged images are show on the right.

**Fig. S4.** Analysis of H<sub>2</sub>O<sub>2</sub> in guard cells. *In situ* accumulation of H<sub>2</sub>O<sub>2</sub> in the guard cells of wild type (WT) and transgenic lines was revealed by histochemical staining assay with H<sub>2</sub>DCF-DA.

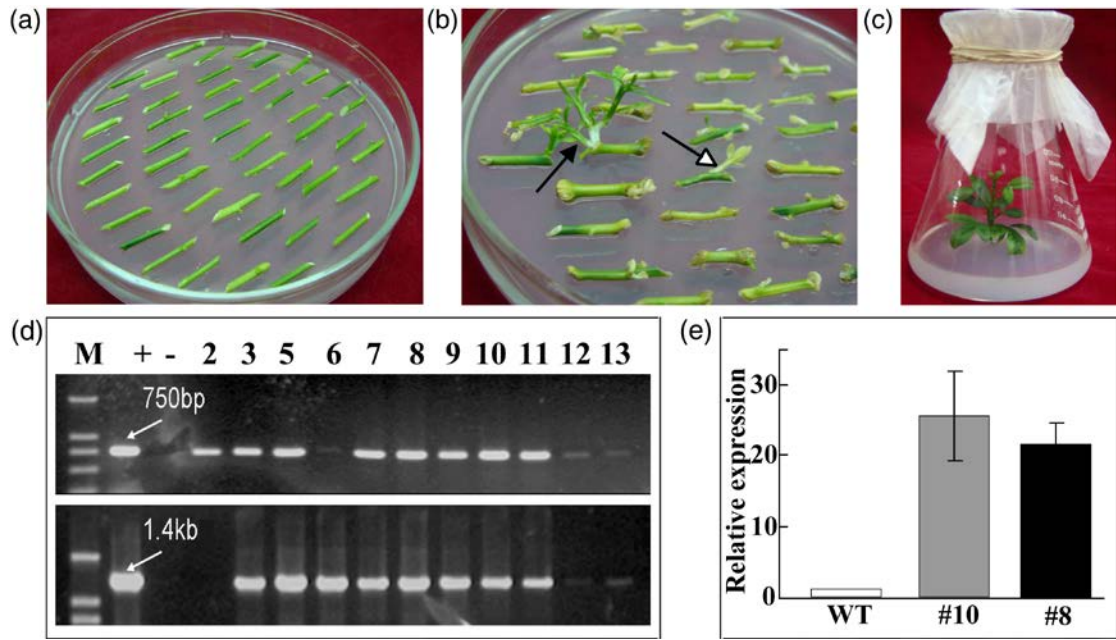

**Fig. S1.**



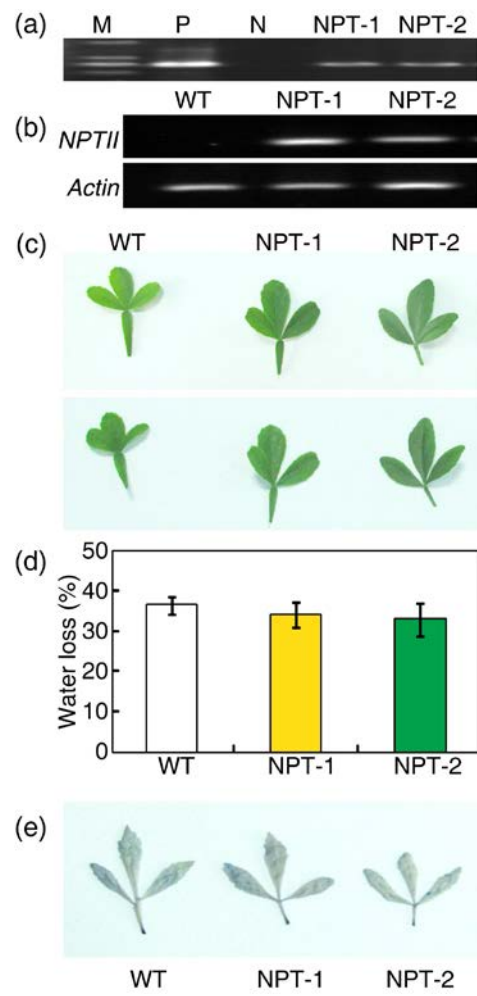

**Fig. S2.**

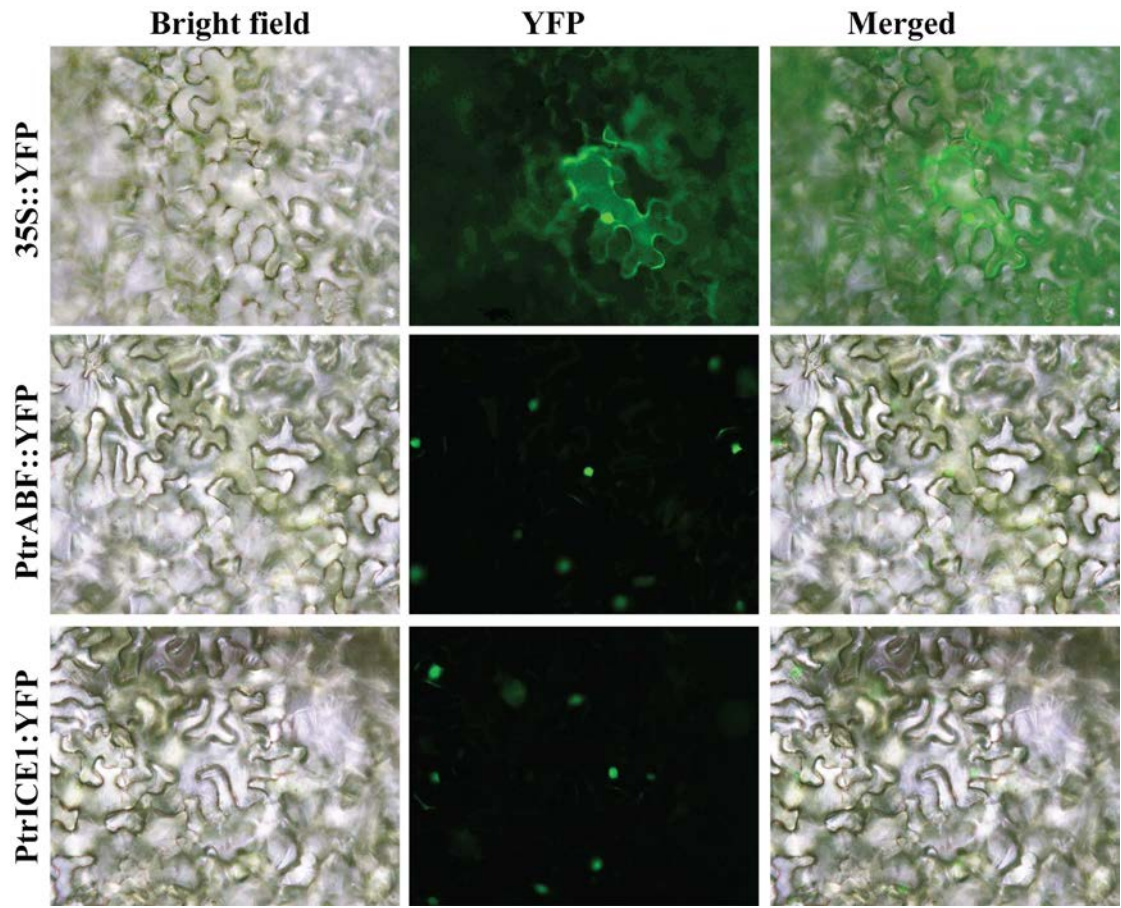

Fig. S3.

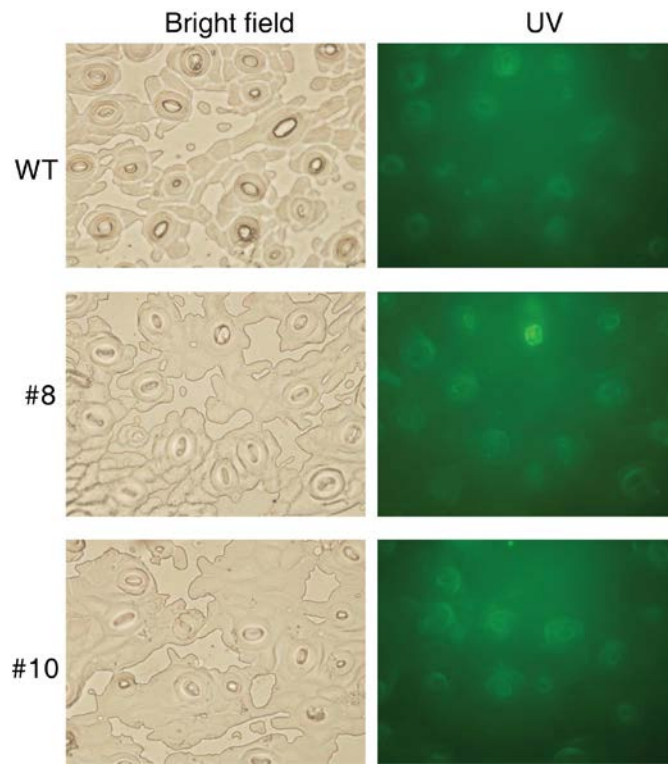

**Fig. S4.**
